# Supplementary material for: Oncogenic histone methyltransferase EZH2: A novel prognostic marker with therapeutic potential in endometrial cancer
Source: PubMed Central journal article supplement (PMC5522273; doi:10.18632/oncotarget.16316), 2017-03-17
Supplement: oncotarget-08-40402-s001.pdf [file oncotarget-08-40402-s001.pdf]

## Oncogenic histone methyltransferase EZH2: A novel prognostic marker with therapeutic potential in endometrial cancer

### SUPPLEMENTARY MATERIALS

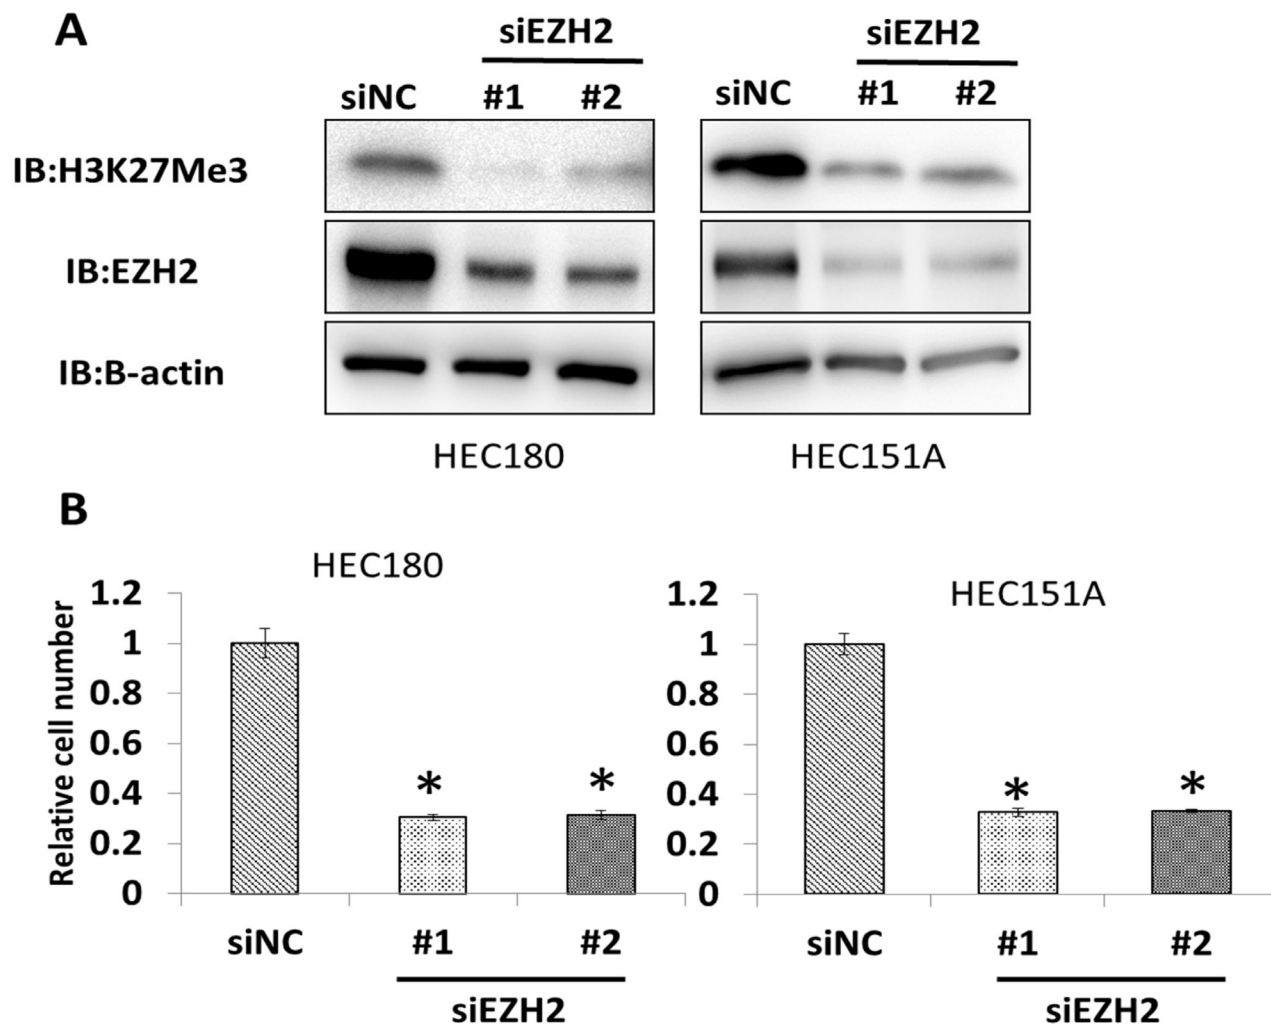

**Supplementary Figure 1: Knockdown of EZH2 induces significant growth suppression in endometrial cancer cell lines.** (A) EZH2 knockdown decreased EZH2 and H3K27me3 protein levels. After treatment of 2 different EZH2 siRNAs (siEZH2#1 and siEZH2#2) and control siRNA (siNC) for 48h in HEC151A and HEC180, western blotting was performed for EZH2 and H3K27me3. (B) EZH2 knockdown induced significant growth suppression. Cell viability assays were performed using Cell Counting Kit-8 (Dojindo) after treatment of EZH2 siRNAs for 96h in HEC151A and HEC180.

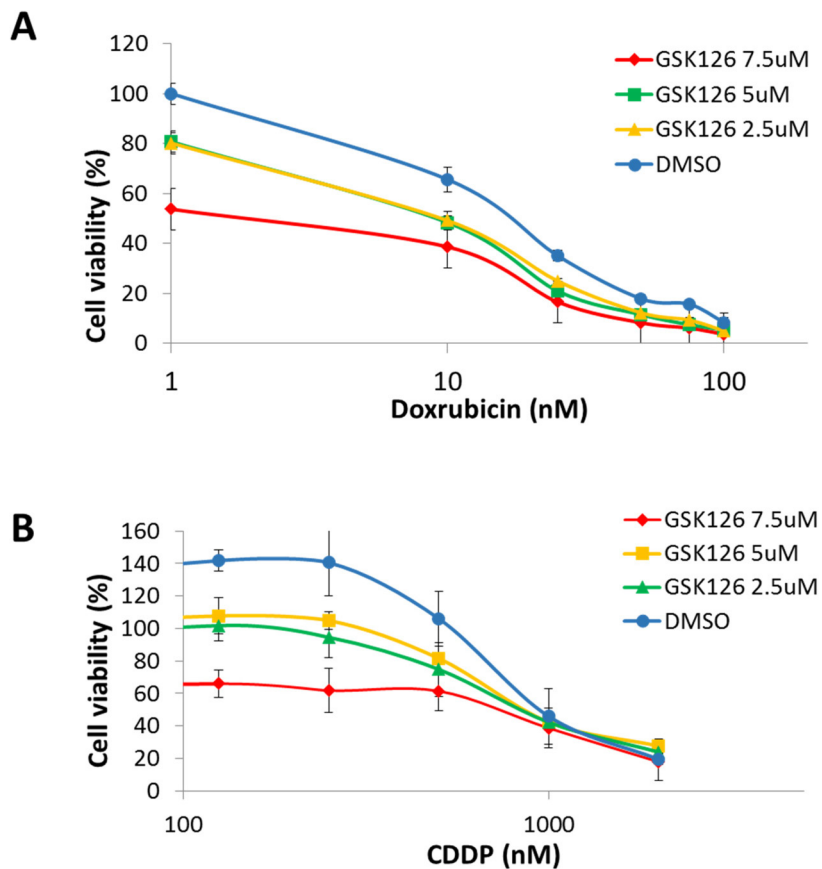

**Supplementary Figure 2: Combination of GSK126 with doxorubicin and cisplatin had an additive effect on endometrial cancer cells.** (A) *In vitro* sensitivity of endometrial cancer cell lines to the combination of GSK126 and doxorubicin. After treatment of HEC1B cells with various concentrations of GSK126 (2.5-7.5  $\mu$ M) and doxorubicin (1-100 nM) for 5 days, a cell viability assay was performed. Cell viability (%) was normalized to that of cells treated with 0.15% DMSO. (B) After treatment of HEC1B cells with various concentrations of GSK126 (2.5-7.5  $\mu$ M) and cisplatin (125-2000 nM) for 5 days, a cell viability assay was performed. Cell viability (%) was normalized to that of cells treated with 0.15% DMSO.

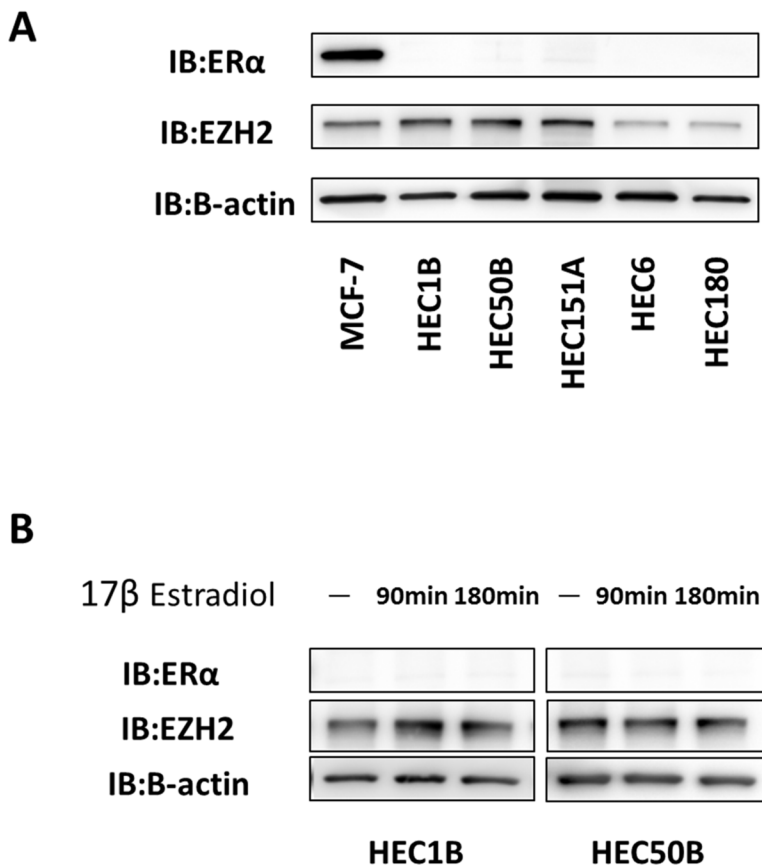

**Supplementary Figure 3: Effect of 17 $\beta$ -estradiol (E2) on EZH2 in endometrial cancer cell lines.** (A) The protein levels of estrogen receptor  $\alpha$  (ER $\alpha$ ) in endometrial cancer cell lines. (B) ER $\alpha$ -positive MCF-7 (breast cancer cell lines) were measured by western blotting. C. After treatment of HEC1B and HEC50B with 10 nM E2 or reduced-serum medium for 90 min or 180 min, western blotting was performed for EZH2 and ER $\alpha$ .

**Supplementary Table 1: Clinicopathological background in 52 patients with endometrial cancer**

See Supplementary File 1

**Supplementary Table 2: Primer Sequences for Quantitative RT-PCR**

| <b>Gene Name</b>            | <b>Primer Sequence</b>     |
|-----------------------------|----------------------------|
| GAPDH (housekeeping gene)-f | 5'-GAAGGTGAAGGTCGGAGTC-3'  |
| GAPDH (housekeeping gene)-r | 5'-GAAGATGGTGATGGGATTTC-3' |
| EZH2-f                      | 5'-CGCTTTTCTGTAGGCGATGT-3' |
| EZH2-r                      | 5'-TGGGTGTTGCATGAAAAGAA-3' |

**Supplementary Table 3: Clinicopathologic characteristics of endometrial cancer tissues on the Tissue Microarray**

See Supplementary File 2

Supplementary Table 4: siRNA Sequences

| siRNA Name | Sequence                             |
|------------|--------------------------------------|
| siEZH2 #1  | Sense: 5'-CUAACCAUGUUUACAACUA-3'     |
|            | Antisense: 5'-UAGUUGUAAACAUGGUUAG-3' |
| siEZH2 #2  | Sense: 5'-GACAGAAGAGGGAAAGUGU-3'     |
|            | Antisense: 5'-ACACUUUCCCUCUUCUGUC-3' |

Supplementary Table 5: Univariate/Multivariate analysis of EZH2 expression in endometrial cancers, using TMA

| Characteristics           | Univariate analysis |            |         | Multivariate analysis |           |         |
|---------------------------|---------------------|------------|---------|-----------------------|-----------|---------|
|                           | HR                  | 95% CI     | P-value | HR                    | 95% CI    | P-value |
| <i>Stage</i>              |                     |            |         |                       |           |         |
| Advanced (III/IV)         | 1.57                | 0.62-3.74  | 0.3229  | 1.29                  | 0.44-3.56 | 0.6327  |
| Early (I/II)              |                     |            |         |                       |           |         |
| <i>Grade</i>              |                     |            |         |                       |           |         |
| G3                        | 1.16                | 0.34-7.25  | 0.8429  |                       |           |         |
| G1/G2                     |                     |            |         |                       |           |         |
| <i>Age</i>                |                     |            |         |                       |           |         |
| ≥60                       | 1.57                | 0.65-3.75  | 0.304   | 1.36                  | 0.55-3.31 | 0.4996  |
| <60                       |                     |            |         |                       |           |         |
| <i>Muscle invasion</i>    |                     |            |         |                       |           |         |
| >1/2                      | 0.56                | 0.09-1.95  | 0.407   | 0.37                  | 0.06-1.35 | 0.1459  |
| ≤1/2                      |                     |            |         |                       |           |         |
| <i>EZH2 expression</i>    |                     |            |         |                       |           |         |
| Strong                    | 6.25                | 1.30-112.2 | 0.017   | 5.31                  | 1.04-96.9 | 0.0442  |
| Weak                      |                     |            |         |                       |           |         |
| <i>Lymphatic invasion</i> |                     |            |         |                       |           |         |
| Yes                       | 1.8                 | 0.68-4.33  | 0.2222  | 1.17                  | 0.38-3.47 | 0.7774  |
| No                        |                     |            |         |                       |           |         |
| <i>Vascular invasion</i>  |                     |            |         |                       |           |         |
| Yes                       | 2.59                | 1.02-6.15  | 0.0448  | 2.41                  | 0.89-6.13 | 0.0818  |
| No                        |                     |            |         |                       |           |         |



Supplementary Table 6: Univariate/Multivariate analysis of EZH2 expression in 540 endometrial cancers, using RNA sequencing data from TCGA

| Characteristics        | Univariate analysis |           |         | Multivariate analysis |           |         |
|------------------------|---------------------|-----------|---------|-----------------------|-----------|---------|
|                        | HR                  | 95% CI    | P-value | HR                    | 95% CI    | P-value |
| <i>Stage</i>           |                     |           |         |                       |           |         |
| Advanced (III/IV)      | 2.84                | 1.97-4.09 | <0.0001 | 2.95                  | 1.89-4.58 | <0.0001 |
| Early (I/II)           |                     |           |         |                       |           |         |
| <i>Grade</i>           |                     |           |         |                       |           |         |
| G3                     | 1.78                | 1.20-2.71 | 0.042   | 1.13                  | 0.66-1.94 | 0.665   |
| G1/G2                  |                     |           |         |                       |           |         |
| <i>Age</i>             |                     |           |         |                       |           |         |
| ≥60                    | 1.56                | 1.05-2.41 | 0.0288  | 1.43                  | 0.88-2.39 | 0.1559  |
| <60                    |                     |           |         |                       |           |         |
| <i>Muscle invasion</i> |                     |           |         |                       |           |         |
| >1/2                   | 2.47                | 1.66-3.67 | <0.0001 | 1.68                  | 1.08-2.60 | 0.0201  |
| ≤1/2                   |                     |           |         |                       |           |         |
| <i>EZH2 expression</i> |                     |           |         |                       |           |         |
| High                   | 1.63                | 1.08-2.55 | 0.0187  | 1.35                  | 0.82-2.32 | 0.2444  |
| Low                    |                     |           |         |                       |           |         |
| <i>Histology</i>       |                     |           |         |                       |           |         |
| Non-endometrioid       | 1.87                | 1.28-2.71 | 0.0015  | 1.19                  | 0.71-2.03 | 0.5097  |
| Endometrioid           |                     |           |         |                       |           |         |
