# Supplementary material for: Oncogenic histone methyltransferase EZH2: A novel prognostic marker with therapeutic potential in endometrial cancer
Source: PubMed Central journal article supplement (PMC5522273; doi:10.18632/oncotarget.16316), 2017-03-17
Supplement: oncotarget-08-40402-s002.pdf [file oncotarget-08-40402-s002.pdf]

**Table 1. Clinicopathological background in 52 patients with endometrial cancer.**

| Case No. | Age (years) | Histologic Diagnosis                                     | Grade | Stage (TNM) |
|----------|-------------|----------------------------------------------------------|-------|-------------|
| 1        | 47          | Normal                                                   | -     | -           |
| 2        | 31          | Normal                                                   | -     | -           |
| 3        | 41          | Normal                                                   | -     | -           |
| 4        | unclear     | Normal                                                   | -     | -           |
| 5        | 42          | Endometroid adenocarcinoma                               | G1    | pT1aN0M0    |
| 6        | 58          | Endometroid adenocarcinoma                               | G1    | pT1aN0M0    |
| 7        | 51          | Endometroid adenocarcinoma                               | G1    | pT1aN0M0    |
| 8        | 34          | Endometroid adenocarcinoma                               | G1    | pT1aN0M0    |
| 9        | 39          | Endometroid adenocarcinoma                               | G1    | pT1aN0M0    |
| 10       | 31          | Endometroid adenocarcinoma                               | G1    | pT1aN0M0    |
| 11       | 66          | Endometroid adenocarcinoma                               | G1    | pT1aN0M0    |
| 12       | 37          | Endometroid adenocarcinoma                               | G2    | pT1aN0M0    |
| 13       | 40          | Endometroid adenocarcinoma                               | G2    | pT1aN0M0    |
| 14       | 65          | Endometroid adenocarcinoma                               | G2    | pT1aN0M0    |
| 15       | 52          | Endometroid adenocarcinoma                               | G2    | pT1aN0M0    |
| 16       | 46          | Endometroid adenocarcinoma                               | G2    | pT1aN0M0    |
| 17       | 60          | Endometroid adenocarcinoma                               | G3    | pT1aN0M0    |
| 18       | 43          | Endometroid adenocarcinoma with squamous differentiation | G3    | pT1aN0M0    |
| 19       | 31          | Endometroid adenocarcinoma with squamous differentiation | G3    | pT1aN0M0    |
| 20       | 60          | Endometroid adenocarcinoma                               | G1    | pT1bN0M0    |
| 21       | 73          | Endometroid adenocarcinoma                               | G2    | pT1bN0M0    |
| 22       | 67          | Endometroid adenocarcinoma                               | G2    | pT1bN0M0    |
| 23       | 64          | Endometroid adenocarcinoma                               | G2    | pT1bN0M0    |
| 24       | 68          | Endometroid adenocarcinoma                               | G2    | pT1bN0M0    |
| 25       | 55          | Endometroid adenocarcinoma                               | G3    | pT1bN0M0    |
| 26       | 51          | Endometroid adenocarcinoma                               | G3    | pT1bN0M0    |
| 27       | 54          | Endometroid adenocarcinoma                               | G3    | pT1bN0M0    |
| 28       | 79          | Endometroid adenocarcinoma                               | G3    | pT1bNXM0    |
| 29       | 52          | Endometroid adenocarcinoma                               | G3    | pT1bN0M0    |
| 30       | 57          | Endometroid adenocarcinoma                               | G1    | pT2N0M0     |
| 31       | 48          | Endometroid adenocarcinoma                               | G1    | pT2N0M0     |
| 32       | 44          | Endometroid adenocarcinoma with squamous differentiation | G1    | pT2N0M0     |
| 33       | 72          | Endometroid adenocarcinoma                               | G1    | pT2N0M0     |

---

|    |    |                                                          |    |          |
|----|----|----------------------------------------------------------|----|----------|
| 34 | 68 | Endometroid adenocarcinoma with squamous differentiation | G2 | pT2N0M0  |
| 35 | 48 | Endometroid adenocarcinoma with squamous differentiation | G2 | pT2N0M0  |
| 36 | 42 | Endometroid adenocarcinoma                               | G3 | pT2N0M0  |
| 37 | 66 | Endometroid adenocarcinoma with squamous differentiation | G1 | pT3bN0M0 |
| 38 | 66 | Endometroid adenocarcinoma                               | G3 | pT3bN0M0 |
| 39 | 45 | Endometroid adenocarcinoma with squamous differentiation | G1 | pT2N1M0  |
| 40 | 57 | Endometroid adenocarcinoma                               | G1 | pT1aN1M0 |
| 41 | 63 | Endometroid adenocarcinoma with squamous differentiation | G2 | pT3bN1M0 |
| 42 | 53 | Endometroid adenocarcinoma with squamous differentiation | G1 | pT1bN1M0 |
| 43 | 59 | Endometroid adenocarcinoma                               | G1 | pT1bN1M0 |
| 44 | 66 | Endometroid adenocarcinoma                               | G1 | pT2N1M0  |
| 45 | 63 | Endometroid adenocarcinoma                               | G1 | pT2N1M0  |
| 46 | 75 | Endometroid adenocarcinoma                               | G2 | pT3aN1M0 |
| 47 | 71 | Endometroid adenocarcinoma                               | G2 | pT3bN1M0 |
| 48 | 56 | Endometroid adenocarcinoma                               | G3 | pT1bN1M0 |
| 49 | 48 | Endometroid adenocarcinoma                               | G3 | pT1bN1M0 |
| 50 | 66 | Endometroid adenocarcinoma                               | G3 | pT3aN1M0 |
| 51 | 41 | Endometroid adenocarcinoma                               | G3 | pT1aN1M0 |
| 52 | 52 | Endometroid adenocarcinoma                               | G3 | pTbN1M0  |
| 53 | 44 | Endometroid adenocarcinoma                               | G3 | pT3aN1M0 |
| 54 | 64 | Endometroid adenocarcinoma                               | G1 | pT3aNXM1 |
| 55 | 45 | Endometroid adenocarcinoma                               | G1 | pT3bNXM1 |
| 56 | 44 | Endometroid adenocarcinoma                               | G3 | pT4N1M0  |

---
